# Supplementary material for: Explainable Artificial Intelligence for Deep Learning in Food
Source: Research Square preprint supplement (doi:10.21203/rs.3.rs-7289201/v1), 2025-08-21
Supplement: Supplementary file 1 [file 3ac17a5756f1bd472199c5dc.xlsx]

## Sheet: Sheet1
Domain	Task	Modality	Method	Benefit	Evaluation	Year	Title	DOI
Food security	crop disease detection	image	LIME	Model understanding	No evaluation	2024	An Explainable AI (XAI)-Based Framework for Detecting Diseases in Paddy Crops \cite{sowmiyan2024anexplaina}	10.1007/978-981-99-7817-5_31
Food security	crop disease detection	image	gradcam,tsne	Model understanding	No evaluation	2022	Classification of Cassava Leaf Disease Based on a Non-Balanced Dataset Using Transformer-Embedded ResNet \cite{zhong2022classifica}	10.3390/agriculture12091360
Food security	crop disease detection	image	smoothgrad	Model understanding	No evaluation	2022	CoffeeSE: Interpretable Transfer Learning Method for Estimating the Severity of Coffee Rust \cite{incahuanaco-quispe2022coffeesein}	10.1007/978-3-031-04447-2_23
Food security	crop disease detection	image	TCAV	Model understanding	No evaluation	2023	Concept Explainability for Plant Diseases Classificatio \cite{amara2023conceptexp}	10.5220/0011667900003417
Food security	crop disease detection	image	backpropagation based	Model understanding	No evaluation	2024	DeepRice: A deep learning and deep feature based classification of Rice leaf disease subtypes \cite{ritharson2024deepricead}	10.1016/j.aiia.2023.11.001
Food security	crop disease detection	spectral	saliency map	Model understanding	Multiple method comparison	2022	Detecting Asymptomatic Infections of Rice Bacterial Leaf Blight Using Hyperspectral Imaging and 3-Dimensional Convolutional Neural Network With Spectral Dilated Convolution \cite{cao2022detectinga}	10.3389/fpls.2022.963170
Food security	crop disease detection	image	gradcam	Model understanding	No evaluation	2023	Effect of CLAHE-based Enhancement on Bean Leaf Disease Classification through Explainable AI \cite{noviandy2023effectofcl}	10.1109/GCCE59613.2023.10315394
Food security	crop disease detection	image	scorecam	Model understanding	No evaluation	2023	Enhancing Explainability in Plant Disease Classification using Score-CAM: Improving Early Diagnosis for Agricultural Productivity \cite{kursun2023enhancinge}	10.1109/IDAACS58523.2023.10348713
Food security	crop disease detection	image	LIME,SHAP,gradcam	Model understanding	No evaluation	2023	Evaluation of XAI Models for Interpretation of Deep Learning Techniques’ Results in Automated Plant Disease Diagnosis \cite{de2023evaluation}	10.1007/978-3-031-36957-5_36
Food security	crop disease detection	image	LIME	Model understanding	Domain expert	2024	I-LDD: an interpretable leaf disease detector \cite{mishra2024ilddaninte}	10.1007/s00500-023-08512-2
Food security	crop disease detection	image	gradcam	Model understanding	No evaluation	2023	Plant Disease Classification using Interpretable Vision Transformer Network \cite{maurya2023plantdisea}	10.1109/REEDCON57544.2023.10151342
Food security	crop disease detection	image,tabular	ontology	User trust	User survey	2023	Towards improving prediction accuracy and user-level explainability using deep learning and knowledge graphs: A study on cassava disease \cite{chhetri2023towardsimp}	10.1016/j.eswa.2023.120955
Food security	crop disease detection	image	reconstructed image with highlights	Model enhancement	No evaluation	2023	“EffiNet-TS”: A deep interpretable architecture using EfficientNet for plant disease detection and visualization \cite{gehlot2023effinettsa}	10.1007/s41348-023-00707-x
Food security	crop disease detection	image	teacher-student	Model understanding	No evaluation	2023	AI-Driven Validation of Digital Agriculture Models \cite{romero-gainza2023aidrivenva}	10.3390/s23031187
Food security	crop disease detection	image	SHAP for feature selection	Model enhancement	Model performance	2024	DC2Net: An Asian Soybean Rust Detection Model Based on Hyperspectral Imaging and Deep Learning \cite{feng2024dc2netanas}	10.34133/plantphenomics.0163
Food security	crop disease detection	image	gradcam,occlusion	Model understanding	No evaluation	2024	Robust diagnosis and meta visualizations of plant diseases through deep neural architecture with explainable AI \cite{natarajan2024robustdiag}	10.1038/s41598-024-64601-8
Food security	crop disease detection	image	gradcam,smoothgrad,LIME	Model understanding	No evaluation	2022	Explainable Deep Learning Study for Leaf Disease Classification \cite{wei2022explainabl}	10.3390/agronomy12051035
Food security	crop disease detection	image	clustercam	Model understanding	Domain expert	2018	An explainable deep machine vision framework for plant stress phenotyping \cite{ghosal2018anexplaina}	10.1073/pnas.1716999115
Food security	crop disease detection	image,text	gradcam	Model understanding	No evaluation	2021	Crop disease identification and interpretation method based on multimodal deep learning \cite{zhou2021cropdiseas}	10.1016/j.compag.2021.106408
Food security	crop disease detection	image	gradcam	Model understanding	No evaluation	2023	Channel Attention-Guided Lightweight CNN Meets Extreme Learning Machine: Multi-Class Crop Leaf Disease Classification with Explainable AI \cite{islam2023channelatt}	10.1109/ICCIT60459.2023.10441609
Food security	crop disease detection	image	SHAP	Model understanding	No evaluation	2023	Unraveling the Black Box: Interpreting CNNs for Leaf Disease Detection through Model Analysis and Feature Importance \cite{ghazouani2023unraveling}	10.1109/INISTA59065.2023.10310344
Food security	crop disease detection	image	gradcam,LIME	Model understanding	No evaluation	2023	Vision transformer meets convolutional neural network for plant disease classification \cite{thakur2023visiontran}	10.1016/j.ecoinf.2023.102245
Food security	crop disease detection	image	LIME	Model understanding	No evaluation	2024	Plant Leaf disease detection using XAI \cite{patil2024plantleafd}	10.1109/AIIoT58432.2024.10574617
Food security	crop disease detection	image	LIME	Model understanding	No evaluation	2024	Improving Plant Disease Classification with Deep Learning based Prediction Model using Explainable Artificial Intelligence \cite{nigar2024improvingp}	10.1109/ACCESS.2024.3428553
Food security	crop disease detection	image	inherent - FFT	Model enhancement	Model performance	2023	A fast Fourier convolutional deep neural network for accurate and explainable discrimination of wheat yellow rust and nitrogen deficiency from Sentinel-2 time series data \cite{shi2023afastfouri}	10.3389/fpls.2023.1250844
Food security	crop disease detection	image	eclf	Model understanding	Multiple method comparison	2024	Achieving explainability for plant disease classification with disentangled variational autoencoders \cite{habaragamuwa2024achievinge}	10.1016/j.engappai.2024.107982
Food security	crop disease detection	spectral	saliency map	Model understanding	No evaluation	2019	Plant disease identification using explainable 3D deep learning on hyperspectral images \cite{nagasubramanian2019plantdisea}	10.1186/s13007-019-0479-8
Food security	crop disease detection	image	SHAP,LIME	Model understanding	No evaluation	2023	Interpretable Deep Learning for Diagnosis of Maize Streak Disease \cite{kalyango2023interpreta}	10.1109/AAIAC60008.2023.10465315
Food security	crop disease detection	image	saliency map,gradcam	Model understanding	No evaluation	2023	Explainable AI for Tomato Leaf Disease Detection: Insights into Model Interpretability \cite{mahmud2023explainabl}	10.1109/ICCIT60459.2023.10441570
Food security	crop disease detection	image	gradcam	Model understanding	No evaluation	2023	Maize leaf disease classification using CBAM and lightweight Autoencoder network \cite{cui2023maizeleafd}	10.1007/s12652-022-04438-z
Food security	crop disease detection	image	cam	Model understanding	No evaluation	2023	Computer aided detection of leaf disease in agriculture using convolution neural network based squeeze and excitation network \cite{krishnan2023computerai}	10.1080/00051144.2023.2241792
Food security	crop disease detection	image	LIME	User trust	No evaluation	2024	Automatic Diagnosis of Plant Diseases via Triple Attention Embedded Vision Transformer Model \cite{gole2024automaticd}	10.1007/978-981-99-4071-4_67
Food security	crop disease detection	image	backpropagation based	Model understanding	No evaluation	2022	Explainable Interactive Projections for Image Data \cite{han2022explainabl}	10.1007/978-3-031-20713-6_6
Food security	crop disease detection	image	gradcam	Model understanding	No evaluation	2024	A Lightweight CNN-SVM Explainable AI Approach for Classification and Visualization of Grape Leaf Disease \cite{peyal2024alightweig}	10.1109/ICAEEE62219.2024.10561852
Food security	crop disease detection	image	SHAP	Model understanding	No evaluation	2023	Image-Based Identification of Plant Diseases and Nutrient Deficiency Using Interpretable Machine Learning \cite{mkhatshwa2023imagebased}	10.1109/DDP60485.2023.00028
Food security	crop disease detection	image	LRP	Model understanding	No evaluation	2024	Corn leaf disease: insightful diagnosis using VGG16 empowered by explainable AI \cite{tariq2024cornleafdi}	10.3389/fpls.2024.1402835
Food security	crop disease detection	image	CIU	Model understanding	No evaluation	2022	Smartphone Based Grape Leaf Disease Diagnosis and Remedial System Assisted with Explanations \cite{malhi2022smartphone}	10.1007/978-3-031-15565-9_4
Food security	crop disease detection	image	gradcam,LIME	Model understanding	No evaluation	2023	BotanicX-AI: Identification of Tomato Leaf Diseases Using an Explanation-Driven Deep-Learning Model \cite{bhandari2023botanicxai}	10.3390/jimaging9020053
Food security	crop disease detection	image	guided gradcam,integrated gradients	Model understanding	No evaluation	2023	Unveiling the Opacity: Exploring Rationality and Explainability in Tomato Disease Classification \cite{golash2023unveilingt}	10.1109/SmartTechCon57526.2023.10391741
Food security	crop disease detection	image	gradcam,LIME	User trust	No evaluation	2022	Explainable AI for Crop disease detection \cite{rakesh2022explainabl}	10.1109/ICAC3N56670.2022.10074303
Food security	crop disease detection	image	reconstructed image with highlights	Model enhancement	No evaluation	2022	ResTS: Residual Deep interpretable architecture for plant disease detection \cite{shah2022restsresid}	10.1016/j.inpa.2021.06.001
Food security	crop disease detection	image	cam	Model understanding	No evaluation	2024	A multi-scale feature fusion neural network for multi-class disease classification on the maize leaf images \cite{liu2024amultiscal}	10.1016/j.heliyon.2024.e28264
Food security	crop disease detection	image	LIME	Model understanding	No evaluation	2022	Plant Leaf Disease Detection using Transfer Learning and Explainable AI \cite{mehedi2022plantleafd}	10.1109/IEMCON56893.2022.9946513
Food security	crop disease detection	image	gradcam	Model understanding	No evaluation	2024	Discovering the Depths of Cotton Leaf Disease Detection: Integrating Hypertuned Residual Networks with GradCAM XAI for Enhanced Understanding and Diagnosis \cite{sarkar2024discoverin}	10.1109/ICAEEE62219.2024.10561737
Food security	crop disease detection	image	integrated gradients,gradcam	Downstream task	Downstream task performance	2021	Deep learning-based saliency maps for the quantification of grape powdery mildew at the microscopic level \cite{qiu2021deeplearni}	10.13031/aim.202100496
Food security	crop disease detection	image	tsne,SHAP	Model understanding	No evaluation	2024	DFN-PSAN: Multi-level deep information feature fusion extraction network for interpretable plant disease classification \cite{dai2024dfnpsanmul}	10.1016/j.compag.2023.108481
Food security	crop disease detection	image	SHAP	Model understanding	No evaluation	2023	Automatic blight disease detection in potato (Solanum tuberosum L.) and tomato (Solanum lycopersicum, L. 1753) plants using deep learning \cite{anim-ayeko2023automaticb}	10.1016/j.atech.2023.100178
Food security	crop disease detection	image	tsne	Model understanding	No evaluation	2024	Next generation of computer vision for plant disease monitoring in precision agriculture: A contemporary survey, taxonomy, experiments, and future direction \cite{ding2024nextgenera}	10.1016/j.ins.2024.120338
Food security	crop disease detection	image	gradcam	Model understanding	No evaluation	2024	CSXAI: a lightweight 2D CNN-SVM model for detection and classification of various crop diseases with explainable AI visualization \cite{prince2024csxaialigh}	10.3389/fpls.2024.1412988
Food security	crop disease detection	image	SHAP,LIME	Model understanding	No evaluation	2023	Explainable Artificial Intelligence for Maize Disease Diagnostics \cite{banadda2023explainabl}	10.1109/CSDE59766.2023.10487660
Food security	crop disease detection	image	LIME	Model understanding	No evaluation	2023	Recognition of Sunflower Diseases Using Hybrid Deep Learning and Its Explainability with AI \cite{ghosh2023recognitio}	10.3390/math11102241
Food security	crop disease detection	image	trainable attention	Model enhancement	No evaluation	2024	PD-TR: End-to-end plant diseases detection using a transformer \cite{wang2024pdtrendtoe}	10.1016/j.compag.2024.109123
Food security	crop disease detection	image	iterative guided masking	Model understanding	Multiple method comparison	2023	Explainable AI for Deep Learning Based Potato Leaf Disease Detection \cite{bengamra2023explainabl}	10.1109/FUZZ52849.2023.10309803
Food security	crop disease detection	image	gradcam	Model understanding	No evaluation	2023	Leaf disease severity classification with explainable artificial intelligence using transformer networks \cite{bandi2023leafdiseas}	10.19101/IJATEE.2022.10100136
Food security	crop disease detection	image	cam	Model understanding	No evaluation	2023	Rice leaf disease identification by residual-distilled transformer \cite{zhou2023riceleafdi}	10.1016/j.engappai.2023.106020
Food security	crop disease detection	image	SHAP	Model understanding	No evaluation	2023	Explainable deep learning model for automatic mulberry leaf disease classification \cite{nahiduzzaman2023explainabl}	10.3389/fpls.2023.1175515
Food security	crop disease detection	image	LIME	Model understanding	No evaluation	2022	Interpretable Disease Classification in Plant Leaves using Deep Convolutional Neural Networks \cite{mahin2022interpreta}	10.1109/ICCIT57492.2022.10055126
Food security	crop disease detection	image	eigencam	Model understanding	No evaluation	2022	Data-centric annotation analysis for plant disease detection: Strategy, consistency, and performance \cite{dong2022datacentri}	10.3389/fpls.2022.1037655
Food security	crop disease detection	image	layercam,scorecam,ablationcam,xgradcam	Downstream task	Downstream task performance	2023	Classification and localization of maize leaf spot disease based on weakly supervised learning \cite{yang2023classifica}	10.3389/fpls.2023.1128399
Food security	crop disease detection	image	cam	Model understanding	No evaluation	2022	Explainable Neural Network for Classification of Cotton Leaf Diseases \cite{amin2022explainabl}	10.3390/agriculture12122029
Food security	crop disease detection	image	gradcam	Model understanding	No evaluation	2023	Explainable Deep Learning for Coffee Leaf Disease Classification in Smart Agriculture: A Visual Approach \cite{mridha2023explainabl}	10.1109/ICDCECE57866.2023.10151399
Food security	crop disease detection	image	LIME	Model understanding	No evaluation	2023	Rice Crop Disease Detection Using Explainable AI \cite{chivukula2023ricecropdi}	10.1109/GCITC60406.2023.10425857
Food security	crop disease detection	image	gradcam	Downstream task	No evaluation	2020	Wheat Diseases Classification and Localization Using Convolutional Neural Networks and GradCAM Visualization \cite{ennadifi2020wheatdisea}	10.1109/ISCV49265.2020.9204258
Food security	crop disease detection	image,tabular	trainable attention,cam	Model enhancement	No evaluation	2023	An Interpretable High-Accuracy Method for Rice Disease Detection Based on Multisource Data and Transfer Learning \cite{li2023aninterpre}	10.3390/plants12183273
Food security	crop disease detection	image	gradcam	Model understanding	No evaluation	2023	Cotton Leaf Disease Classification using Deep Convolution Neural Network with Explainable AI \cite{otiya2023cottonleaf}	10.1109/ICSCNA58489.2023.10370214
Food security	crop disease detection	image	cam	Model understanding	No evaluation	2020	Learned features of leaf phenotype to monitor maize water status in the fields \cite{zhuang2020learnedfea}	10.1016/j.compag.2020.105347
Food security	crop disease detection	image	cam	Model understanding	No evaluation	2021	Rice diseases detection and classification using attention based neural network and bayesian optimization \cite{wang2021ricediseas}	10.1016/j.eswa.2021.114770
Food security	crop disease detection	image	inherent - reconstruction	Model enhancement	Model performance	2021	Image-based Plant Disease Diagnosis with Unsupervised Anomaly Detection based on Reconstructability of Colors \cite{katafuchi2021imagebased}	10.5220/0010463201120120
Food security	crop disease detection	image	LIME	Model understanding	No evaluation	2024	A deep learning-based approach for early detection of disease in sugarcane plants: an explainable artificial intelligence model \cite{ethiraj2024adeeplearn}	10.11591/ijai.v13.i1.pp974-983
Food security	crop disease detection	image	gradcam	Model understanding	No evaluation	2024	Image analysis with deep learning for early detection of downy mildew in grapevine \cite{hernández2024imageanaly}	10.1016/j.scienta.2024.113155
Food security	crop disease detection	image	cam	Model understanding	No evaluation	2024	S2AM: a sustainable smart agriculture model for crop protection based on deep learning \cite{sharma2024s2amasusta}	10.1007/s41348-024-00934-w
Food security	crop disease detection	image	gradcam	User trust	No evaluation	2024	Mulberry Leaf Disease Detection Using CNN-Based Smart Android Application \cite{salam2024mulberryle}	10.1109/ACCESS.2024.3407153
Food security	crop disease detection	image	gradcam	Model understanding	No evaluation	2021	Iot and interpretable machine learning based framework for disease prediction in pearl millet \cite{kundu2021iotandinte}	10.3390/s21165386
Food security	crop disease detection	image	SHAP,LIME	Model understanding	No evaluation	2024	A study and comparison of deep learning based potato leaf disease detection and classification techniques using explainable AI \cite{paul2024astudyandc}	10.1007/s11042-023-17235-3
Food security	crop disease detection	image	LIME	Model understanding	No evaluation	2024	Optimizing Disease Identification in Mango Leaves: A Channel Attention Approach with Enhanced EfficientNet \cite{miah2024optimizing}	10.1109/ICEEICT62016.2024.10534486
Food security	crop disease detection	image	LIME,gradcam	User trust	No evaluation	2023	A Smartphone-Based Detection System for Tomato Leaf Disease Using EfficientNetV2B2 and Its Explainability with Artificial Intelligence (AI) \cite{debnath2023asmartphon}	10.3390/s23218685
Food security	crop disease detection	image	cam	Model understanding	No evaluation	2020	Potato Crop Disease Classification Using Convolutional Neural Network \cite{agarwal2020potatocrop}	10.1007/978-981-13-8406-6_37
Food security	crop disease detection	image	gradcam	Model understanding	No evaluation	2024	Explainable AI Based framework for Banana Disease Detection \cite{ashoka2024explainabl}	10.1109/ICITIIT61487.2024.10580364
Food security	crop disease detection	image	SHAP	Model understanding	No evaluation	2023	Interpretable Diagnosis of Banana Leaf Sigatoka Disease using CNNs and Shapley Values \cite{freire2023interpreta}	10.1109/LA-CCI58595.2023.10409324
Food security	crop disease detection	image	saliency map	Model understanding	No evaluation	2023	Classification of crop leaf diseases using image to image translation with deep-dream \cite{sahu2023classifica}	10.1007/s11042-023-14994-x
Food security	crop yield	spectral	trainable attention	Model enhancement	Model performance	2022	A deep learning crop model for adaptive yield estimation in large areas \cite{zhu2022adeeplearn}	10.1016/j.jag.2022.102828
Food security	crop yield	tabular	stepwise sensitivity analysis	Model understanding	No evaluation	2021	A deep learning framework under attention mechanism for wheat yield estimation using remotely sensed indices in the Guanzhong Plain, PR China \cite{tian2021adeeplearn}	10.1016/j.jag.2021.102375
Food security	crop yield	tabular	causal inference	Model understanding	Domain- or method-specific metric	2022	DeepFarm: AI-Driven Management of Farm Production using Explainable Causality \cite{wang2022deepfarmai}	10.1109/STC55697.2022.00013
Food security	crop yield	tabular	RAM	Model understanding	No evaluation	2020	Estimating and understanding crop yields with explainable deep learning in the Indian Wheat Belt \cite{wolanin2020estimating}	10.1088/1748-9326/ab68ac
Food security	crop yield	tabular	permutation based feature importance,activation maps	Model understanding	No evaluation	2020	Interpretability of Recurrent Neural Networks in Remote Sensing \cite{perez-suay2020interpreta}	10.1109/IGARSS39084.2020.9323898
Food security	crop yield	tabular	occlusion,integrated gradients,SHAP	Model understanding	Domain expert	2023	Interpretability of deep learning models for crop yield forecasting \cite{paudel2023interpreta}	10.1016/j.compag.2023.107663
Food security	crop yield	tabular	integrated gradients,SHAP	Model understanding	Multiple method comparison	2023	Interpretable Long Short-Term Memory Networks for Crop Yield Estimation \cite{mateo-sanchis2023interpreta}	10.1109/LGRS.2023.3244064
Food security	crop yield	image,genomics	trainable attention	Model enhancement	No evaluation	2023	Multi-modal deep learning improves grain yield prediction in wheat breeding by fusing genomics and phenomics \cite{togninalli2023multimodal}	10.1093/bioinformatics/btad336
Food security	crop yield	tabular	occlusion	Model understanding	No evaluation	2024	Daily DeepCropNet: A hierarchical deep learning approach with daily time series of vegetation indices and climatic variables for corn yield estimation \cite{xiong2024dailydeepc}	10.1016/j.isprsjprs.2024.02.008
Food security	crop yield	tabular	SHAP	Model understanding	No evaluation	2023	Interpretable Cotton Yield Prediction Model Using Earth Observation Time Series \cite{isik2023interpreta}	10.1109/IGARSS52108.2023.10281702
Food security	crop yield	tabular	trainable attention	Model enhancement	Model performance	2019	Duo Attention with Deep Learning on Tomato Yield Prediction and Factor Interpretation \cite{de2019duoattenti}	10.1007/978-3-030-29894-4_56
Food security	crop yield	tabular	trainable attention	Model enhancement	Model performance	2021	Crop yield prediction integrating genotype and weather variables using deep learning \cite{shook2021cropyieldp}	10.1371/journal.pone.0252402
Food security	crop yield	tabular,spectral	permutation based feature importance	Model understanding	No evaluation	2021	Maize yield prediction at an early developmental stage using multispectral images and genotype data for preliminary hybrid selection \cite{danilevicz2021maizeyield}	10.3390/rs13193976
Food security	crop yield prediction	image	LIME,SHAP,LRP,integrated gradients,input x gradient,saliency map,occlusion	Model understanding	Multiple method comparison	2023	Feature Attribution Methods for Multivariate Time-Series Explainability in Remote Sensing \cite{najjar2023featureatt}	10.1109/IGARSS52108.2023.10282120
Food security	crop yield prediction	tabular	trainable attention	Model enhancement	No evaluation	2022	Rice Yield Prediction and Model Interpretation Based on Satellite and Climatic Indicators Using a Transformer Method \cite{liu2022riceyieldp}	10.3390/rs14195045
Food security	crop yield prediction	tabular	SHAP	Model understanding	No evaluation	2024	A novel transformer-based neural network under model interpretability for improving wheat yield estimation using remotely sensed multi-variables \cite{guo2024anoveltran}	10.1016/j.compag.2024.109111
Food security	crop yield prediction	tabular	trainable attention	Model enhancement	No evaluation	2023	Wheat Yield Prediction using Temporal Fusion Transformers \cite{junankar2023wheatyield}	10.1109/INOCON57975.2023.10101144
Food security	crop yield prediction	image	SHAP for feature selection	Model enhancement	No evaluation	2024	Hybrid Deep Neural Networks with Multi-Tasking for Rice Yield Prediction Using Remote Sensing Data \cite{chang2024hybriddeep}	10.3390/agriculture14040513
Food security	crop yield prediction	tabular	counterfactual explanations	Model understanding	No evaluation	2023	Counterfactual Explanations of Neural Network-Generated Response Curves \cite{morales2023counterfac}	10.1109/IJCNN54540.2023.10191746
Food security	pest recognition	image	interpretable concepts	User trust	Domain expert	2023	Automatic Generation of Visual Concept-based Explanations for Pest Recognition \cite{yuan2023automaticg}	10.1109/INDIN51400.2023.10217975
Food security	pest recognition	image	gradcam,LIME,input x gradient,integrated gradients,occlusion	Downstream task	Downstream task performance	2022	Explainable deep convolutional neural networks for insect pest recognition \cite{coulibaly2022explainabl}	10.1016/j.jclepro.2022.133638
Food security	pest recognition	image	SHAP	Model understanding	No evaluation	2024	End-to-End Jute-Pest Detection By Explainable Lightweight CNN \cite{rana2024endtoendju}	10.1109/ICEEICT62016.2024.10534581
Food security	pest recognition	image	gradcam	Model understanding	No evaluation	2022	New image dataset and new negative sample judgment method for crop pest recognition based on deep learning models \cite{wang2022newimageda}	10.1016/j.ecoinf.2022.101620
Food security	pest recognition	image	LIME	Model understanding	No evaluation	2022	Classifying Insect Pests from Image Data using Deep Learning \cite{mohsin2022classifyin}	10.1109/CISP-BMEI56279.2022.9979872
Food security	pest recognition	image	PCA	Model understanding	No evaluation	2021	Tree-based deep convolutional neural network for hierarchical identification of low-resolution insect images \cite{rustia2021treebasedd}	10.13031/aim.202100437
Food security	crop classification	tabular	tsne	Model understanding	No evaluation	2022	A joint learning Im-BiLSTM model for incomplete time-series Sentinel-2A data imputation and crop classification \cite{chen2022ajointlear}	10.1016/j.jag.2022.102762
Food security	crop classification	image	LRP	Model understanding	No evaluation	2022	Learning of physically significant features from earth observation data: an illustration for crop classification and irrigation scheme detection \cite{arun2022learningof}	10.1007/s00521-022-07019-5
Food security	crop classification	image	LRP	Model understanding	No evaluation	2021	Investigating explanatory factors of machine learning models for plant classification \cite{wöber2021investigat}	10.3390/plants10122674
Food security	crop classification	spectral	LRP	Model understanding	Model performance	2023	XAI for Early Crop Classification \cite{chan2023xaiforearl}	10.1109/IGARSS52108.2023.10281498
Food security	crop classification	image	gradslam	Model understanding	No evaluation	2023	Grad-SLAM: Explaining Convolutional Autoencoders' Latent Space of Satellite Image Time Series \cite{di2023gradslamex}	10.1109/LGRS.2023.3302906
Food security	crop classification	tabular	feature importance for selection	Model enhancement	Model performance	2024	A multi-scale semantic feature fusion method for remote sensing crop classification \cite{huang2024amultiscal}	10.1016/j.compag.2024.109185
Food security	land cover mapping	image	trainable attention	Model enhancement	No evaluation	2019	RNN-based multi-source land cover mapping: An application to West African landscape \cite{eudes2019rnnbasedmu}
Food security	land cover mapping	image	bayesian uncertainty	Model understanding	No evaluation	2024	How can we quantify, explain, and apply the uncertainty of complex soil maps predicted with neural networks? \cite{rau2024howcanwequ}	10.1016/j.scitotenv.2024.173720
Food security	land cover mapping	tabular	SHAP	Model understanding	No evaluation	2023	Mapping integrated crop-livestock systems in Brazil with planetscope time series and deep learning \cite{bueno2023mappingint}	10.1016/j.rse.2023.113886
Food security	land cover mapping	image	gradcam	Model understanding	Model performance	2021	Deep-STaR: Classification of image time series based on spatio-temporal representations \cite{chelali2021deepstarcl}	10.1016/j.cviu.2021.103221
Food security	crop recommendation	tabular	SHAP,LIME	User trust	No evaluation	2024	Analyzing and assessing explainable AI models for smart agriculture environments \cite{cartolano2024analyzinga}	10.1007/s11042-023-17978-z
Food security	crop recommendation	tabular	SHAP,LIME	Model understanding	No evaluation	2022	Explainable AI at Work! What Can It Do for Smart Agriculture? \cite{cartolano2022explainabl}	10.1109/BigMM55396.2022.00020
Food security	crop recommendation	tabular	SHAP	Model understanding	No evaluation	2023	Soil suitability classification for crop selection in precision agriculture using GBRT-based hybrid DNN surrogate models \cite{bhat2023soilsuitab}	10.1016/j.ecoinf.2023.102109
Food security	crop recommendation	tabular	SHAP	Model understanding	No evaluation	2024	XAI-driven model for crop recommender system for use in precision agriculture \cite{naga2024xaidrivenm}	10.1111/coin.12629
Food security	ripeness prediction	image	gradcam,guided gradcam	Model understanding	No evaluation	2023	A Deep Transfer Learning Approach for Accurate Dragon Fruit Ripeness Classification and Visual Explanation using Grad-CAM \cite{vo2023adeeptrans}	10.14569/IJACSA.2023.01411137
Food security	ripeness prediction	image	gradcam	Model understanding	No evaluation	2024	Machine learning system for commercial banana harvesting \cite{hayat2024machinelea}	10.1088/2631-8695/ad5cd2
Food security	ripeness prediction	image	gradcam,occlusion,LIME	Model understanding	No evaluation	2023	Reliability Scores From Saliency Map Clusters for Improved Image-Based Harvest-Readiness Prediction in Cauliflower \cite{kierdorf2023reliabilit}	10.1109/LGRS.2023.3293802
Food security	crop mapping	spectral	backpropagation based,trainable attention,tsne	Model enhancement	No evaluation	2021	Towards interpreting multi-temporal deep learning models in crop mapping \cite{xu2021towardsint}	10.1016/j.rse.2021.112599
Food security	crop mapping	spectral	LRP	Model understanding	Domain- or method-specific metric	2021	Deep learning-based phenological event modeling for classification of crops \cite{arun2021deeplearni}	10.3390/rs13132477
Food security	crop counting	image	trainable attention	Model enhancement	Model performance	2022	Attention-Based Deep Bayesian Counting For AI-Augmented Agriculture \cite{wang2022attentionb}	10.1145/3560905.3568417
Food security	crop counting	image	cam	Model understanding	No evaluation	2022	Lightweight Apple Detection in Complex Orchards Using YOLOV5-PRE \cite{sun2022lightweigh}	10.3390/horticulturae8121169
Food security	plant phenotyping	spectral	gradcam	Model understanding	No evaluation	2021	An automated deep learning pipeline based on advanced optimisations for leveraging spectral classification modelling \cite{passos2021anautomate}	10.1016/j.chemolab.2021.104354
Food security	biomass prediction	tabular	deep archetypal analysis for feature selection	Model enhancement	No evaluation	2022	Sugarcane Biomass Prediction with Multi-Mode Remote Sensing Data Using Deep Archetypal Analysis and Integrated Learning \cite{wang2022sugarcaneb}	10.3390/rs14194944
Food security	biomass prediction	spectral	SHAP	Model understanding	No evaluation	2023	Retrieving canopy nitrogen concentration and aboveground biomass with deep learning for ryegrass and barley: comparing models and determining waveband contribution \cite{patel2023retrieving}	10.1016/j.fcr.2023.108859
Food security	crop biomass prediction	spectral	feature importance	Model understanding	No evaluation	2024	A novel neural network model to achieve generality for diverse morphologies and crop science interpretability in rice biomass estimation \cite{yamaguchi2024anovelneur}	10.1016/j.compag.2024.108653
Food security	rice paddy water temperature forecasting	tabular	trainable attention	Model enhancement	No evaluation	2022	Interpretable Framework of Physics-Guided Neural Network With Attention Mechanism: Simulating Paddy Field Water Temperature Variations \cite{xie2022interpreta}	10.1029/2021WR030493
Food security	fertilizer treatment	image	integrated gradients,gradcam,scorecam,smoothgrad,smooth gradcam	Model understanding	Domain expert	2024	Challenging the Black Box: A Comprehensive Evaluation of Attribution Maps of CNN Applications in Agriculture and Forestry \cite{nieradzik2024challengin}	10.5220/0012363400003660
Food security	pest forecasting	tabular	trainable attention,LIME	Model enhancement	Model performance	2024	Intelligent pest forecasting with meteorological data: An explainable deep learning approach \cite{wang2024intelligen}	10.1016/j.eswa.2024.124137
Food security	maize threshing optimisation	tabular	SHAP	Model understanding	No evaluation	2024	Optimising maize threshing by integrating DEM simulation and interpretive enhanced predictive modelling \cite{fang2024optimising}	10.1016/j.biosystemseng.2024.06.001
Food security	growth stage prediction	image	gradcam	Model understanding	No evaluation	2021	Real-time detection of rice phenology through convolutional neural network using handheld camera images \cite{han2021realtimede}	10.1007/s11119-020-09734-2
Food security	weed detection	image	gradcam	Model understanding	No evaluation	2024	WeedsNet: a dual attention network with RGB-D image for weed detection in natural wheat field \cite{xu2024weedsnetad}	10.1007/s11119-023-10080-2
Food security	water level prediction	tabular	SHAP	Model understanding	No evaluation	2024	A deep time-series water level prediction framework based on internal and external influencing factors: Targeting agricultural irrigation reservoirs \cite{wang2024adeeptimes}	10.1016/j.compag.2024.109060
Food security	crop identification	image	cam for gan loss	Model enhancement	Model performance	2022	Deep learning-based plant classification and crop disease classification by thermal camera \cite{batchuluun2022deeplearni}	10.1016/j.jksuci.2022.11.003
Food security	dairy cow heat stress prediction	tabular	partial dependency plot,LIME	Model understanding	No evaluation	2023	Predicting physiological responses of dairy cows using comprehensive variables \cite{shu2023predicting}	10.1016/j.compag.2023.107752
Food security	weed classification	image	trainable attention	Model enhancement	Model performance	2021	Weed classification using explainable multi-resolution slot attention \cite{farkhani2021weedclassi}	10.3390/s21206705
Food security	milk yield	image	gradcam	Model understanding	No evaluation	2024	Udderly accurate: A deep learning based modelling for determination of dairyness of Sahiwal cow using computer vision \cite{dahiya2024udderlyacc}	10.56093/ijans.v94.i1.141798
Food security	land suitability classification	tabular	permutation based feature importance	Model understanding	No evaluation	2024	Climate Change Impact on Agricultural Land Suitability: An Interpretable Machine Learning-Based Eurasia Case Study \cite{shevchenko2024climatecha}	10.1109/ACCESS.2024.3358865
Food security	crop yield in aeroponics	tabular	SHAP	Model understanding	No evaluation	2023	Interpretability of artificial intelligence models that use data fusion to predict yield in aeroponics \cite{torres-tello2023interpreta}	10.1007/s12652-021-03470-9
Food security	food insecurity prediction	tabular	SHAP for feature selection	Model enhancement	No evaluation	2022	Food security analysis and forecasting: A machine learning case study in southern Malawi \cite{gholami2022foodsecuri}	10.1017/dap.2022.25
Food security	microalgae identification	image	gradcam	Model understanding	No evaluation	2023	Deep Image Analysis for Microalgae Identification \cite{soar2023deepimagea}	10.1007/978-3-031-48316-5_28
Food security	plant nutrient deficiency	image	gradcam,SHAP	Model understanding	No evaluation	2024	Analysing the Performance and Interpretability of CNN-Based Architectures for Plant Nutrient Deficiency Identification \cite{mkhatshwa2024analysingt}	10.3390/computation12060113
Food security	groundwater mapping	spectral,tabular	partial dependency plot	Model understanding	No evaluation	2024	Empowered machine learning algorithm to identify sustainable groundwater potential zone map in Jashore District, Bangladesh \cite{roy2024empoweredm}	10.1016/j.gsd.2024.101168
Food security	crop disease detection,land cover mapping,plant identification	image	inherent - vegetation indices	Model enhancement	Model performance	2022	A Biologically Interpretable Two-Stage Deep Neural Network (BIT-DNN) for Vegetation Recognition from Hyperspectral Imagery \cite{shi2022abiologica}	10.1109/TGRS.2021.3058782
Food security	water quality	tabular	trainable attention	Model enhancement	Model performance	2021	A dual-head attention model for time series data imputation \cite{zhang2021adualheada}	10.1016/j.compag.2021.106377
Food security	crop maturity detection	image	saliency map	Model understanding	No evaluation	2023	Explainable interactive projections of images \cite{han2023explainabl}	10.1007/s00138-023-01452-9
Food security	pest alarm	tabular	SHAP,LIME	Model understanding	No evaluation	2023	Olive Oil Fly Population Pest Forecasting Using Explainable Deep Learning \cite{chacón-maldonado2023oliveoilfl}	10.1007/978-3-031-42536-3_12
Other	land cover mapping	image	LIME	Model understanding	No evaluation	2021	Explainable Custom CNN Architecture for Land Use Classification using Satellite Images \cite{verma2021explainabl}	10.1109/ICIIP53038.2021.9702698
Other	evapotranspiration forecasting	tabular	SHAP	Model understanding	No evaluation	2021	A Deep Neural Network Architecture to Model Reference Evapotranspiration Using a Single Input Meteorological Parameter \cite{ravindran2021adeepneura}	10.1007/s40710-021-00543-x
Other	evapotranspiration forecasting	tabular	SHAP	Model understanding	No evaluation	2023	Explainable hybrid deep learning and Coronavirus Optimization Algorithm for improving evapotranspiration forecasting \cite{troncoso-garcía2023explainabl}	10.1016/j.compag.2023.108387
Other	evapotranspiration forecasting	tabular	SHAP	Model understanding	No evaluation	2021	Comparison of physical-based, data-driven and hybrid modeling approaches for evapotranspiration estimation \cite{hu2021comparison}	10.1016/j.jhydrol.2021.126592
Other	soil spectral analysis	spectral	cam	Model understanding	No evaluation	2024	Soil organic carbon mapping utilizing convolutional neural networks and Earth observation data, a case study in Bavaria state Germany \cite{tziolas2024soilorgani}	10.1016/j.geoderma.2024.116867
Other	soil spectral analysis	spectral	SHAP	Model understanding	No evaluation	2021	Soil properties: Their prediction and feature extraction from the LUCAS spectral library using deep convolutional neural networks \cite{zhong2021soilproper}	10.1016/j.geoderma.2021.115366
Other	soil spectral analysis	spectral	SHAP	Model understanding	No evaluation	2024	SHAP values accurately explain the difference in modeling accuracy of convolution neural network between soil full-spectrum and feature-spectrum \cite{zhong2024shapvalues}	10.1016/j.compag.2024.108627
Other	precision spraying	image	gradcam	Model understanding	No evaluation	2023	An Agricultural Precision Sprayer Deposit Identification System \cite{rogers2023anagricult}	10.1109/CASE56687.2023.10260374
Other	precision spraying	image	gradcam,eigencam,eigen gradcam	Model understanding	Multiple method comparison	2023	An Automated Precision Spraying Evaluation System \cite{rogers2023anautomate}	10.1007/978-3-031-43360-3_3
Other	soil erosion detection	tabular	SHAP	Model understanding	No evaluation	2023	An artificial intelligence-based assessment of soil erosion probability indices and contributing factors in the Abha-Khamis watershed, Saudi Arabia \cite{alqadhi2023anartifici}	10.3389/fevo.2023.1189184
Other	soil erosion detection	tabular	SHAP	Model understanding	No evaluation	2024	Interpretation of Bayesian-optimized deep learning models for enhancing soil erosion susceptibility prediction and management: a case study of Eastern India \cite{alkahtani2024interpreta}	10.1080/10106049.2024.2367611
Other	crop segmentation	image	cam	Model understanding	No evaluation	2022	Multi-network fusion algorithm with transfer learning for green cucumber segmentation and recognition under complex natural environment \cite{bai2022multinetwo}	10.1016/j.compag.2022.106789
Other	crop segmentation	image	gaussian prototypes	Model enhancement	Model performance	2023	A Differentiable Gaussian Prototype Layer for Explainable Fruit Segmentation \cite{gerstenberger2023adifferent}	10.1109/ICIP49359.2023.10222905
Other	plant phenotyping	genomics	trainable attention	Model enhancement	Model performance	2022	Phenotype Prediction by Heterogeneous Molecular Network Embedding \cite{tan2022phenotypep}	10.1109/BIBM55620.2022.9995118
Other	plant identification	image	LIME	Model understanding	No evaluation	2022	Explainable Approach for Species Identification using LIME \cite{nikam2022explainabl}	10.1109/IBSSC56953.2022.10037417
Other	plant identification	image	SHAP	Model understanding	No evaluation	2024	Advancing automatic plant classification system in Saudi Arabia: introducing a novel dataset and ensemble deep learning approach \cite{amri2024advancinga}	10.1007/s40808-023-01918-9
Other	soil strength	tabular	SHAP	Model understanding	No evaluation	2024	Integrative Machine Learning Framework for Soil Strength and State Prediction \cite{lakshmi2024integrativ}	10.33472/AFJBS.6.Si2.2024.2612-2626
Other	crop moisture content	spectral,image	SHAP for feature selection	Model enhancement	Model performance	2021	A novel approach to identify the spectral bands that predict moisture content in canola and wheat \cite{torres-tello2021anovelappr}	10.1016/j.biosystemseng.2021.08.004
Other	qr code reader for supply chain management	image	SHAP	User trust	No evaluation	2023	A Blockchain-Driven Food Supply Chain Management Using QR Code and XAI-Faster RCNN Architecture \cite{bhatia2023ablockchai}	10.3390/su15032579
Other	lncRNA identification in plant genome assemblies	genomics	integrated gradients	Model understanding	No evaluation	2023	DNABERT-based explainable lncRNA identification in plant genome assemblies \cite{danilevicz2023dnabertbas}	10.1016/j.csbj.2023.11.025
Other	named entity recognition of diseases and pests	text	trainable attention	Model enhancement	No evaluation	2024	Named entity recognition (NER) for Chinese agricultural diseases and pests based on discourse topic and attention mechanism \cite{wang2024namedentit}	10.1007/s12065-022-00727-w
Other	tillage practice mapping	spectral	trainable attention	Model enhancement	Model performance	2023	Utility of daily 3 m Planet Fusion Surface Reflectance data for tillage practice mapping with deep learning \cite{luo2023utilityofd}	10.1016/j.srs.2023.100085
Other	soil water content	spectral,tabular	SHAP	Model understanding	No evaluation	2022	Towards near real-time national-scale soil water content monitoring using data fusion as a downscaling alternative \cite{fuentes2022towardsnea}	10.1016/j.jhydrol.2022.127705
Other	abnormal vocalization detection for pig welfare	sound,spectral	trainable attention,gradcam	Model enhancement	No evaluation	2024	Sound identification of abnormal pig vocalizations: Enhancing livestock welfare monitoring on smart farms \cite{xie2024soundident}	10.1016/j.ipm.2024.103770
Other	predictive maintenance in smart agriculture	tabular	SHAP,DICE	User trust	No evaluation	2024	Explainable Artificial Intelligence Model for Predictive Maintenance in Smart Agricultural Facilities \cite{kisten2024explainabl}	10.1109/ACCESS.2024.3365586
Other	leaf area index prediction	tabular	SHAP	Model understanding	No evaluation	2024	Improved estimation of cotton (Gossypium hirsutum L.) LAI from multispectral data using UAV point cloud data \cite{zhang2024improvedes}	10.1016/j.indcrop.2024.118851
Other	dust occurrence mapping	tabular	trainable attention	Model enhancement	No evaluation	2024	Spatial mapping of land susceptibility to dust emissions using optimization of attentive Interpretable Tabular Learning (TabNet) model \cite{razavi-termeh2024spatialmap}	10.1016/j.jenvman.2024.120682
Other	soil moisture	tabular	permutation based feature importance,smoothgrad	Model understanding	No evaluation	2023	Interpreting Conv-LSTM for Spatio-Temporal Soil Moisture Prediction in China \cite{huang2023interpreti}	10.3390/agriculture13050971
Other	soil condition and genotype classificationb	image	gradcam,guided backpropagation	Model understanding	No evaluation	2022	A soybean seedlings dataset for soil condition and genotype classification \cite{nascimento2022asoybeanse}	10.1109/SIBGRAPI55357.2022.9991792
Other	winter wheat mapping	tabular	SHAP	Model understanding	No evaluation	2024	Integration of harvester trajectory and satellite imagery for large-scale winter wheat mapping using deep positive and unlabeled learning \cite{xiong2024integratio}	10.1016/j.compag.2023.108487
Other	biochemical trait estimation	spectral	gradcam	Model understanding	No evaluation	2024	Analyzing winter-wheat biochemical traits using hyperspectral remote sensing and deep learning \cite{yue2024analyzingw}	10.1016/j.compag.2024.109026
Other	biogas production in wastewater treatment	tabular	feature importance	Model understanding	No evaluation	2021	Prediction of biogas production in anaerobic co-digestion of organic wastes using deep learning models \cite{jeong2021prediction}	10.1016/j.watres.2021.117697
Other	hop variety classification	image	permutation based feature importance	Model understanding	No evaluation	2023	Merging Traditional Feature Extraction and Deep Learning for Enhanced Hop Variety Classification: A Comparative Study Using the UFOP-HVD Dataset \cite{castro2023mergingtra}	10.1007/978-3-031-45389-2_21
Other	greenhouse gas flux prediction	tabular	feature importance for selection	Model enhancement	Model performance	2022	KGML-ag: a modeling framework of knowledge-guided machine learning to simulate agroecosystems: a case study of estimating N2O emission using data from mesocosm experiments \cite{liu2022kgmlagamod}	10.5194/gmd-15-2839-2022
Other	anticancer food molecules prediction	graph	integrated gradient	Model understanding	No evaluation	2021	Predicting anticancer hyperfoods with graph convolutional networks \cite{gonzalez2021predicting}	10.1186/s40246-021-00333-4
Other	crop row detection	image	latent landscapes,gradcam,occlusion	Model understanding	Model performance	2024	Analyzing and interpreting convolutional neural networks using latent space topology \cite{lópez-gonzález2024analyzinga}	10.1016/j.neucom.2024.127806
Other	abstract classification	text	interpretable feature extraction	Model enhancement	No evaluation	2023	Deep Natural Language Feature Learning for Interpretable Prediction \cite{urrutia2023deepnatura}
Other	soil fungal abundance and diversity	spectral,tabular	permutation based feature importance	Model understanding	No evaluation	2022	Estimating soil fungal abundance and diversity at a macroecological scale with deep learning spectrotransfer functions \cite{yang2022estimating}	10.5194/soil-8-223-2022
Food quality	ripeness prediction	image	gradcam,guided gradcam	Model understanding	No evaluation	2023	A Deep Transfer Learning Approach for Accurate Dragon Fruit Ripeness Classification and Visual Explanation using Grad-CAM \cite{vo2023adeeptrans}	10.14569/IJACSA.2023.01411137
Food quality	ripeness prediction	image	gradcam	Model understanding	No evaluation	2024	Machine learning system for commercial banana harvesting \cite{hayat2024machinelea}	10.1088/2631-8695/ad5cd2
Food quality	crop quality classification	image	inherent - physics guided	Model enhancement	Model performance	2024	Physics-Guided Inverse Regression for Crop Quality Assessment \cite{shulman2024physicsgui}	10.1007/s13253-024-00643-9
Food quality	crop quality classification	image	gradcam	Model understanding	No evaluation	2023	Explainable Deep Learning Models With Gradient-Weighted Class Activation Mapping for Smart Agriculture \cite{quach2023explainabl}	10.1109/ACCESS.2023.3296792
Food quality	crop quality classification	image	gradcam	Model understanding	Downstream task performance	2024	Tomato Health Monitoring System: Tomato Classification, Detection, and Counting System Based on YOLOv8 Model With Explainable MobileNet Models Using Grad-CAM++ \cite{quach2024tomatoheal}	10.1109/ACCESS.2024.3351805
Food quality	meat freshness	image	tsne	Model understanding	No evaluation	2024	Visible detection of chilled beef freshness using a paper-based colourimetric sensor array combining with deep learning algorithms \cite{lin2024visibledet}	10.1016/j.foodchem.2023.138344
Food quality	meat freshness	image	gradcam,umap	Model understanding	No evaluation	2024	Fast real-time monitoring of meat freshness based on fluorescent sensing array and deep learning: From development to deployment \cite{lin2024fastrealti}	10.1016/j.foodchem.2024.139078
Food quality	tomato quality trait identification	tabular	SHAP	Model understanding	No evaluation	2024	A Comparative Analysis of XGBoost and Neural Network Models for Predicting Some Tomato Fruit Quality Traits from Environmental and Meteorological Data \cite{m’hamdi2024acomparati}	10.3390/plants13050746
Food quality	tomato quality and maturity detection	spectral	permutation based feature importance for RNN	Model understanding	No evaluation	2023	Determination of quality and maturity of processing tomatoes using near-infrared hyperspectral imaging with interpretable machine learning methods \cite{zhao2023determinat}	10.1016/j.lwt.2023.114861
Food quality	rare ginsenoside contents in ginseng	spectral	feature importance for selection	Model enhancement	Model performance	2024	Fast prediction of diverse rare ginsenoside contents in Panax ginseng through hyperspectral imaging assisted with the temporal convolutional network-attention mechanism (TCNA) deep learning \cite{wang2024fastpredic}	10.1016/j.foodcont.2024.110455
Food quality	measuring soluble solid content	image	trainable attention	Model enhancement	Model performance	2023	A Quantitative Spectra Analysis Framework Combining Mixup and Band Attention for Predicting Soluble Solid Content of Blueberries \cite{li2023aquantitat}	10.1007/978-3-031-40292-0_30
Food quality	quality inspection	image	SHAP	Model understanding	No evaluation	2024	Automated quality inspection of baby corn using image processing and deep learning \cite{wonggasem2024automatedq}	10.1016/j.aiia.2024.01.001
Food quality	livestock intermuscular fat prediction	image	gradcam	Model understanding	No evaluation	2024	PIMFP: An accurate tool for the prediction of intramuscular fat percentage in live pigs using ultrasound images based on deep learning \cite{liu2024pimfpanacc}	10.1016/j.compag.2023.108552
Food quality	seedless fruit detection	image	gradcam,guided gradcam	Model understanding	No evaluation	2021	Noninvasive diagnosis of seedless fruit using deep learning in persimmon \cite{masuda2021noninvasiv}	10.2503/hortj.UTD-248
Food quality	seed moisture	spectral	cam	Model understanding	No evaluation	2023	Moisture content prediction of semen ziziphi spinosae based on hyperspectral images coupled with convolutional neural networks and subregional voting \cite{li2023moistureco}	10.1002/cem.3505
Food quality	tastant classification	tabular,molecular	SHAP	Model understanding	No evaluation	2023	Classification of tastants: A deep learning based approach \cite{dutta2023classifica}	10.1002/minf.202300146
Food quality	origin identification	spectral	saliency map	Model understanding	No evaluation	2020	Application and interpretation of deep learning methods for the geographical origin identification of: Radix Glycyrrhizae using hyperspectral imaging \cite{yan2020applicatio}	10.1039/d0ra06925f
Food quality	umami peptides prediction	molecular	trainable attention	Model enhancement	No evaluation	2023	Umami-BERT: An interpretable BERT-based model for umami peptides prediction \cite{zhang2023umamiberta}	10.1016/j.foodres.2023.113142
Food quality	coffee flavor prediction	spectral	focusing plot	Model understanding	No evaluation	2021	Prediction of specialty coffee flavors based on near-infrared spectra using machine‑ and deep-learning methods \cite{chang2021prediction}	10.1002/jsfa.11116
Food quality	internal cavity and browning detection	image	guided gradcam	Model understanding	No evaluation	2022	Inline nondestructive internal disorder detection in pear fruit using explainable deep anomaly detection on X-ray images \cite{van2022inlinenond}	10.1016/j.compag.2022.106962
Food quality	freshness prediction	image	activation maps	Knowledge discovery	Human improvement	2023	Improving human intuition for vision-based freshness prediction of Citrus reticulata Blanco using machine learning \cite{yu2023improvingh}	10.1016/j.scienta.2023.112300
Food quality	shelf life	image	gradcam,LRP	Knowledge discovery	No evaluation	2022	Deep Learning Predicts Rapid Over-softening and Shelf Life in Persimmon Fruits \cite{suzuki2022deeplearni}	10.2503/hortj.UTD-323
Food quality	wine quality classification	tabular	inherent - ca	Model understanding	No evaluation	2020	Correspondence analysis using neural networks \cite{hsu2020correspond}
Food quality	internal disorder classification	image	guided backpropagation,LRP,gradcam,guided gradcam	Knowledge discovery	No evaluation	2020	Explainable deep learning reproduces a 'Professional eye' on the diagnosis of internal disorders in persimmon fruit \cite{akagi2020explainabl}	10.1093/pcp/pcaa111
Food quality	rice grain quality	image	gradcam	Model understanding	No evaluation	2023	Dissecting the Convolutional Neural Networks via Activation Maps for agricultural rice grain quality prediction \cite{saha2023dissecting}	10.1109/ICCCNT56998.2023.10306803
Food quality	pine nut defect detection	image	gradcam	Model understanding	No evaluation	2024	Defects recognition of pine nuts using hyperspectral imaging and deep learning approaches \cite{peng2024defectsrec}	10.1016/j.microc.2024.110521
Food quality	apple variety classification	image	LIME,cam	Model understanding	No evaluation	2023	Deep Learning-Based Intelligent Apple Variety Classification System and Model Interpretability Analysis \cite{yu2023deeplearni}	10.3390/foods12040885
Food quality	wine sugar content	spectral	SHAP	Model understanding	No evaluation	2023	Estimation of Sugar Content in Wine Grapes via In Situ VNIR–SWIR Point Spectroscopy Using Explainable Artificial Intelligence Techniques \cite{kalopesa2023estimation}	10.3390/s23031065
Food quality	moisture and crude protein content	image	cam	Model understanding	No evaluation	2022	An interpretable deep learning approach for calibration transfer among multiple near-infrared instruments \cite{yang2022aninterpre}	10.1016/j.compag.2021.106584
Food safety	pest recognition	image	interpretable concepts	User trust	Domain expert	2023	Automatic Generation of Visual Concept-based Explanations for Pest Recognition \cite{yuan2023automaticg}	10.1109/INDIN51400.2023.10217975
Food safety	question answering	text	inherent - graph	Model enhancement	No evaluation	2022	Research on food safety multi-hop reasoning question answering based on cognitive graph \cite{shi2022researchon}	10.1109/ICISCAE55891.2022.9927669
Food safety	mushroom species classification	image	tsne	Model understanding	No evaluation	2022	Automatic Mushroom Species Classification Model for Foodborne Disease Prevention Based on Vision Transformer \cite{wang2022automaticm}	10.1155/2022/1173102
Food safety	maize threshing optimisation	tabular	SHAP	Model understanding	No evaluation	2024	Optimising maize threshing by integrating DEM simulation and interpretive enhanced predictive modelling \cite{fang2024optimising}	10.1016/j.biosystemseng.2024.06.001
Food safety	pathogen prediction in poultry	tabular	SHAP for feature selection	Model enhancement	No evaluation	2024	Towards Interpreting Multi-Objective Feature Associations \cite{pillai2024towardsint}	10.1109/SysCon61195.2024.10553467
Food safety	allergen classification	spectral	permutation based feature importance	Model understanding	No evaluation	2022	Domain Adaptation for In-Line Allergen Classification of Agri-Food Powders Using Near-Infrared Spectroscopy \cite{bowler2022domainadap}	10.3390/s22197239
Food safety	heavy metal pollution prediction	tabular	inherent - graph	Model enhancement	Model performance	2024	A novel prediction approach driven by graph representation learning for heavy metal concentrations \cite{hao2024anovelpred}	10.1016/j.scitotenv.2024.174713
Food safety	crop root concentration factor prediction	tabular	feature importance	Model understanding	No evaluation	2022	Predicting crop root concentration factors of organic contaminants with machine learning models \cite{gao2022predicting}	10.1016/j.jhazmat.2021.127437
Food safety	pathogen monitoring in seafood production	tabular	SHAP	Model understanding	No evaluation	2022	Machine learning to predict dynamic changes of pathogenic Vibrio spp. abundance on microplastics in marine environment \cite{jiang2022machinelea}	10.1016/j.envpol.2022.119257
Food safety	single cell lag time prediction	tabular	SHAP	Model understanding	No evaluation	2022	Machine learning approach for predicting single cell lag time of Salmonella Enteritidis after heat and chlorine treatment \cite{lin2022machinelea}	10.1016/j.foodres.2022.111132
Food safety	food fraud risk prediction	tabular	LIME,SHAP	Model understanding	Multiple method comparison	2023	Food fraud detection using explainable artificial intelligence \cite{buyuktepe2023foodfraudd}	10.1111/exsy.13387
Food safety	groundwater contamination detection	tabular	SHAP	Model understanding	No evaluation	2022	Prediction of Dichloroethene Concentration in the Groundwater of a Contaminated Site Using XGBoost and LSTM \cite{xia2022prediction}	10.3390/ijerph19159374
Food safety	exchangeable potassium prediction	spectral	SHAP	Model understanding	No evaluation	2022	Prediction of exchangeable potassium in soil through mid-infrared spectroscopy and deep learning: From prediction to explainability \cite{albinet2022prediction}	10.1016/j.aiia.2022.10.001
Nutrition	food recognition	image	LIME,gradcam	Model understanding	No evaluation	2021	Explainable Artificial Intelligence in Oriental Food Recognition using Convolutional Neural Network \cite{lim2021explainabl}	10.1109/ICSET53708.2021.9612442
Nutrition	food recognition	image	SHAP,gradcam	User trust	No evaluation	2021	Explainable deep learning ensemble for food image analysis on edge devices \cite{tahir2021explainabl}	10.1016/j.compbiomed.2021.104972
Nutrition	food recognition	image	LRP	Downstream task	Downstream task performance	2023	Food Recognition with Visual Transformers \cite{bianco2023foodrecogn}	10.1109/ICCE-Berlin58801.2023.10375660
Nutrition	food recognition	image	trainable attention	Model enhancement	Model performance	2019	Ingredient-guided cascaded multi-attention network for food recognition \cite{min2019ingredient}	10.1145/3343031.3350948
Nutrition	food recognition	image	occlusion	Model understanding	No evaluation	2020	Interpretability of neural network binary classification with part analysis \cite{gorokhovatskyi2020interpreta}	10.1109/DSMP47368.2020.9204310
Nutrition	food recognition	image	SHAP for feature selection	Model enhancement	No evaluation	2021	Progressive kernel extreme learning machine for food image analysis via optimal features from quality resilient CNN \cite{tahir2021progressiv}	10.3390/app11209562
Nutrition	food recognition	image	trainable attention	Model enhancement	No evaluation	2023	Vision Outlooker-Based Hierarchical Food Classification \cite{kathar2023visionoutl}	10.1109/TENCON58879.2023.10322530
Nutrition	question answering	text	kg creation	Downstream task	Downstream task performance	2023	KG4NH: A Comprehensive Knowledge Graph for Question Answering in Dietary Nutrition and Human Health \cite{fu2023kg4nhacomp}	10.1109/JBHI.2023.3338356
Nutrition	food recommender	tabular,image	rule mining	User trust	No evaluation	2022	An effective explainable food recommendation using deep image clustering and community detection \cite{rostami2022aneffectiv}	10.1016/j.iswa.2022.200157
Food fraud	date variety classification	image	gradcam	Model understanding	No evaluation	2023	Transfer Learning and Explainable Artificial Intelligence Enhance the Classification of Date Fruit Varieties \cite{zaki2023transferle}	10.1109/IIT59782.2023.10366495
Food fraud	honey origin	spectral	integrated gradients,saliency map,deeplift,SHAP for feature selection,input x gradient,guided backpropagation,deconvolution,gradcam,occlusion,feature ablation	Model enhancement	No evaluation	2023	Explainable AI-driven wavelength selection for hyperspectral imaging of honey products \cite{zhang2023explainabl}	10.1016/j.focha.2023.100491
Food fraud	rice origin	spectral	feature importance for selection	Model enhancement	Model performance	2024	Towards generalizable food source identification: An explainable deep learning approach to rice authentication employing stable isotope and elemental marker analysis \cite{chu2024towardsgen}	10.1016/j.foodres.2024.113967
Food fraud	food fraud risk prediction	tabular	LIME,SHAP	Model understanding	Multiple method comparison	2023	Food fraud detection using explainable artificial intelligence \cite{buyuktepe2023foodfraudd}	10.1111/exsy.13387
