# Supplementary material for: Explainable Artificial Intelligence for Deep Learning in Food
Source: Research Square preprint supplement (doi:10.21203/rs.3.rs-7289201/v1), 2025-08-21
Supplement: Supplementary file 2 [file 9f173d2376bbc6e7d651dcc6.xlsx]

## Sheet: Sheet1
Name	Capacity	Time of use	Locality	Number of studies	Method type	Novel	Reference (if available)
Grad-CAM	model specific	post hoc	local	58	Backpropagation-based	No	Selvaraju, R. R., Cogswell, M., Das, A., Vedantam, R., Parikh, D., & Batra, D. (2017). Grad-cam: Visual explanations from deep networks via gradient-based localization. In Proceedings of the IEEE international conference on computer vision (pp. 618-626).
SHAP	model agnostic	post hoc	local	49	Perturbation-based	No	Lundberg, S. (2017). A unified approach to interpreting model predictions. arXiv preprint arXiv:1705.07874.
LIME	model agnostic	post hoc	local	34	Perturbation-based	No	Ribeiro, M. T., Singh, S., & Guestrin, C. (2016, August). " Why should i trust you?" Explaining the predictions of any classifier. In Proceedings of the 22nd ACM SIGKDD international conference on knowledge discovery and data mining (pp. 1135-1144).
Trainable attention	model specific	model based	local	24	Trainable attention	No	Dzmitry Bahdanau, Kyunghyun Cho, and Yoshua Bengio. Neural machine translation by jointly learning to align and translate. CoRR, abs/1409.0473, 2014. URL http://arxiv.org/ abs/1409.0473.
CAM	model specific	post hoc	local	15	Backpropagation-based	No	Zhou, B., Khosla, A., Lapedriza, A., Oliva, A., & Torralba, A. (2016). Learning deep features for discriminative localization. In Proceedings of the IEEE conference on computer vision and pattern recognition (pp. 2921-2929).
LRP	model specific	post hoc	local	9	Backpropagation-based	No	Bach, S., Binder, A., Montavon, G., Klauschen, F., Müller, K. R., & Samek, W. (2015). On pixel-wise explanations for non-linear classifier decisions by layer-wise relevance propagation. PloS one, 10(7), e0130140.
Occlusion	model specific	post hoc	local	9	Occlusion-based	No
Integrated gradients	model specific	post hoc	local	9	Backpropagation-based	No	Sundararajan, M., Taly, A., & Yan, Q. (2017, July). Axiomatic attribution for deep networks. In International conference on machine learning (pp. 3319-3328). PMLR.
Saliency map	model specific	post hoc	local	8	Backpropagation-based	No	Simonyan, K., Vedaldi, A., & Zisserman, A. (2013). Deep inside convolutional networks: Visualising image classification models and saliency maps. arXiv preprint arXiv:1312.6034.
Permutation based feature importance	model agnostic	post hoc	local	7	Perturbation-based	No
t-SNE	model specific	post hoc	global	7	Dimension reduction	No	Van der Maaten, L., & Hinton, G. (2008). Visualizing data using t-SNE. Journal of machine learning research, 9(11).
SHAP for feature selection	model specific	model based	global	6	Perturbation-based	No	Lundberg, S. (2017). A unified approach to interpreting model predictions. arXiv preprint arXiv:1705.07874.
Guided grad-CAM	model specific	post hoc	local	5	Backpropagation-based	No	Selvaraju, R. R., Cogswell, M., Das, A., Vedantam, R., Parikh, D., & Batra, D. (2017). Grad-cam: Visual explanations from deep networks via gradient-based localization. In Proceedings of the IEEE international conference on computer vision (pp. 618-626).
Feature importance for selection	model specific	model based	global	4	Perturbation-based	No
Smoothgrad	model specific	post hoc	local	4	Backpropagation-based	No	Smilkov, D., Thorat, N., Kim, B., Viégas, F., & Wattenberg, M. (2017). Smoothgrad: removing noise by adding noise. arXiv preprint arXiv:1706.03825.
Gradient SHAP	model specific	post hoc	local	4	Backpropagation-based	No	Lundberg, S. (2017). A unified approach to interpreting model predictions. arXiv preprint arXiv:1705.07874.
Backpropagation based	model specific	post hoc	local	3	Backpropagation-based	No
ScoreCAM	model specific	post hoc	local	3	Backpropagation-based	No	Wang, H., Wang, Z., Du, M., Yang, F., Zhang, Z., Ding, S., ... & Hu, X. (2020). Score-CAM: Score-weighted visual explanations for convolutional neural networks. In Proceedings of the IEEE/CVF conference on computer vision and pattern recognition workshops (pp. 24-25).
Feature importance	model specific	post hoc	global	3	Perturbation-based	No
Guided backpropagation	model specific	post hoc	local	3	Backpropagation-based	No	Springenberg, J. T., Dosovitskiy, A., Brox, T., & Riedmiller, M. (2014). Striving for simplicity: The all convolutional net. arXiv preprint arXiv:1412.6806.
Input x gradient	model specific	post hoc	local	3	Backpropagation-based	No	Avanti Shrikumar, Peyton Greenside, Anna Shcherbina, and Anshul Kundaje. Not just a black box: Learning important features through propagating activation differences. arXiv preprint arXiv:1605.01713, 2016.
EigenCAM	model specific	post hoc	local	2	Backpropagation-based	No	Muhammad, M. B., & Yeasin, M. (2020, July). Eigen-cam: Class activation map using principal components. In 2020 international joint conference on neural networks (IJCNN) (pp. 1-7). IEEE.
Inherent - graph	model specific	model based	global	2	Graph-based	No
Activation maps	model specific	post hoc	local	2	Backpropagation-based	No
Partial dependency plot	model agnostic	post hoc	global	2	Perturbation-based	No	Friedman, J. H. (2001). Greedy function approximation: a gradient boosting machine. Annals of statistics, 1189-1232.
Reconstructed image with highlights	model specific	model based	local	2	Other	No	Brahimi, M., Mahmoudi, S., Boukhalfa, K., & Moussaoui, A. (2019, September). Deep interpretable architecture for plant diseases classification. In 2019 signal processing: Algorithms, architectures, arrangements, and applications (SPA) (pp. 111-116). IEEE.
Rule mining	model specific	post hoc	global,local	1	Other	No
Stepwise sensitivity analysis	model agnostic	post hoc	local	1	Occlusion-based	No
XGrad-CAM	model specific	post hoc	local	1	Backpropagation-based	No	Fu, R., Hu, Q., Dong, X., Guo, Y., Gao, Y., & Li, B. (2020). Axiom-based grad-cam: Towards accurate visualization and explanation of cnns. arXiv preprint arXiv:2008.02312.
Grad-SLAM	model specific	post hoc	local	1	Backpropagation-based	Yes	Grad-SLAM: Explaining Convolutional Autoencoders' Latent Space of Satellite Image Time Series
CAM for gan loss	model specific	model based	local	1	Backpropagation-based	Yes	Deep learning-based plant classification and crop disease classification by thermal camera
Inherent - reconstruction	model specific	model based	local	1	Other	Yes	Image-based Plant Disease Diagnosis with Unsupervised Anomaly Detection based on Reconstructability of Colors
AVCEG (Interpretable concepts)	model specific	post hoc	global,local	1	Interpretable concepts	Yes	Automatic Generation of Visual Concept-based Explanations for Pest Recognition
Permutation based feature importance for RNN	model specific	post hoc	local	1	Perturbation-based	No	Freeborough, W., & van Zyl, T. (2022). Investigating explainability methods in recurrent neural network architectures for financial time series data. Applied Sciences, 12(3), 1427.
LayerCAM	model specific	post hoc	local	1	Backpropagation-based	No	Jiang, P. T., Zhang, C. B., Hou, Q., Cheng, M. M., & Wei, Y. (2021). Layercam: Exploring hierarchical class activation maps for localization. IEEE Transactions on Image Processing, 30, 5875-5888.
AblationCAM	model specific	post hoc	local	1	Backpropagation-based	No	Ramaswamy, H. G. (2020). Ablation-cam: Visual explanations for deep convolutional network via gradient-free localization. In proceedings of the IEEE/CVF winter conference on applications of computer vision (pp. 983-991).
Feature ablation	model specific	post hoc	local	1	Occlusion-based	No
Deconvolution	model specific	post hoc	local	1	Backpropagation-based	No
DeepLIFT	model specific	post hoc	local	1	Backpropagation-based	No	Avanti Shrikumar, Peyton Greenside, and Anshul Kundaje. Learning important features through propagating activation differences. In Doina Precup and Yee Whye Teh (eds.), Proceedings of the 34th International Conference on Machine Learning, volume 70 of Proceedings of Machine Learning Research, pp. 3145–3153, International Convention Centre, Sydney, Australia, 06–11 Aug 2017. PMLR. URL http://proce…
RAM	model specific	post hoc	local	1	Backpropagation-based	No	Zhou, B., Khosla, A., Lapedriza, A., Oliva, A., & Torralba, A. (2016). Learning deep features for discriminative localization. In Proceedings of the IEEE conference on computer vision and pattern recognition (pp. 2921-2929).
Knowledge graph creation	model specific	model based	global	1	Graph-based	No
Integrated gradient	model specific	post hoc	local	1	Backpropagation-based	No	Sundararajan, M., Taly, A., & Yan, Q. (2017, July). Axiomatic attribution for deep networks. In International conference on machine learning (pp. 3319-3328). PMLR.
Focusing plot	model specific	post hoc	local	1	Backpropagation-based	Yes	Prediction of specialty coffee flavors based on near-infrared spectra using machine‑ and deep-learning methods
Ontology	model agnostic	post hoc	global	1	Graph-based	No
TCAV	model agnostic	post hoc	local	1	Interpretable concepts	No	Kim, B., Wattenberg, M., Gilmer, J., Cai, C., Wexler, J., & Viegas, F. (2018, July). Interpretability beyond feature attribution: Quantitative testing with concept activation vectors (tcav). In International conference on machine learning (pp. 2668-2677). PMLR.
Inherent - CA	model specific	model based	global	1	Dimension reduction	Yes	Correspondence analysis using neural networks
Interpretable feature extraction	model specific	model based	local	1	Other	Yes	Deep Natural Language Feature Learning for Interpretable Prediction
Causal inference	model specific	post hoc	global	1	Other	Yes	DeepFarm: AI-Driven Management of Farm Production using Explainable Causality
Bayesian uncertainty	model specific	model based	local	1	Other	No	Kristiadi, A., Hein, M., & Hennig, P. (2020, November). Being bayesian, even just a bit, fixes overconfidence in relu networks. In International conference on machine learning (pp. 5436-5446). PMLR.
Black-box teacher - White-box student	model agnostic	post hoc	global,local	1	Other	No
Inherent - vegetation indices	model specific	model based	global	1	Other	Yes	A Biologically Interpretable Two-Stage Deep Neural Network (BIT-DNN) for Vegetation Recognition from Hyperspectral Imagery
ClusterCAM	model specific	post hoc	local	1	Backpropagation-based	Yes	An explainable deep machine vision framework for plant stress phenotyping
ECLF	model specific	post hoc	local	1	Other	Yes	Achieving explainability for plant disease classification with disentangled variational autoencoders
Inherent - FFT	model specific	model based	global	1	Other	Yes	A fast Fourier convolutional deep neural network for accurate and explainable discrimination of wheat yellow rust and nitrogen deficiency from Sentinel-2 time series data
Umap	model specific	post hoc	global	1	Dimension reduction	No	McInnes, L., Healy, J., & Melville, J. (2018). Umap: Uniform manifold approximation and projection for dimension reduction. arXiv preprint arXiv:1802.03426.
Latent landscapes	model specific	post hoc	global	1	Other	Yes	Analyzing and interpreting convolutional neural networks using latent space topology
CIU	model agnostic	post hoc	local	1	Perturbation-based	No	Främling, K. (2022, February). Contextual importance and utility: a theoretical foundation. In Australasian Joint Conference on Artificial Intelligence (pp. 117-128). Cham: Springer International Publishing.
Inherent - physics guided	model specific	model based	global	1	Other	No
Smooth grad-CAM	model specific	post hoc	local	1	Backpropagation-based	No	Omeiza, D., Speakman, S., Cintas, C., & Weldermariam, K. (2019). Smooth grad-cam++: An enhanced inference level visualization technique for deep convolutional neural network models. arXiv preprint arXiv:1908.01224.
Gaussian prototypes	model specific	model based	global,local	1	Other	Yes	A Differentiable Gaussian Prototype Layer for Explainable Fruit Segmentation
Counterfactual explanations	model specific	post hoc	local	1	Other	No
Iterative guided masking	model specific	post hoc	local	1	Occlusion-based	Yes	Explainable AI for Deep Learning Based Potato Leaf Disease Detection
Eigen grad-CAM	model specific	post hoc	local	1	Backpropagation-based	No	Muhammad, M. B., & Yeasin, M. (2020, July). Eigen-cam: Class activation map using principal components. In 2020 international joint conference on neural networks (IJCNN) (pp. 1-7). IEEE.
Deep archetypal analysis for feature selection	model specific	model based	global	1	Other	No	Keller, S. M., Samarin, M., Wieser, M., & Roth, V. (2019, September). Deep archetypal analysis. In German Conference on Pattern Recognition (pp. 171-185). Cham: Springer International Publishing.
DICE	model agnostic	post hoc	local	1	Other	No	Mothilal, R. K., Sharma, A., & Tan, C. (2020, January). Explaining machine learning classifiers through diverse counterfactual explanations. In Proceedings of the 2020 conference on fairness, accountability, and transparency (pp. 607-617).
PCA	model specific	post hoc	global	1	Dimension reduction	No	Maćkiewicz, A., & Ratajczak, W. (1993). Principal components analysis (PCA). Computers & Geosciences, 19(3), 303-342.
